# Supplementary material for: Influence of the gas atmosphere during the synthesis of g-C3N4 for enhanced photocatalytic H2 production from water on Au/g-C3N4 composites
Source: Royal Society of Chemistry journal article supplement (doi:10.1039/c9ta01734h), 2019-01-01
Supplement: c9ta01734h1.pdf [file c9ta01734h1.pdf]

## Influence of gas atmosphere during synthesis of g-C<sub>3</sub>N<sub>4</sub> for enhanced photocatalytic H<sub>2</sub> production from water on Au/g-C<sub>3</sub>N<sub>4</sub> composites

P. Jiménez-Calvo\*, C. Marchal, T. Cottineau, V. Caps, V. Keller\*

<sup>1</sup> ICPEES, Institut de Chimie et Procédés pour l'Énergie, l'Environnement et la Santé, CNRS/Université de Strasbourg, UMR 7515 (CNRS), 25 rue Becquerel 67087 Strasbourg Cedex, France

\*Correspondence to: [vkeller@unistra.fr](mailto:vkeller@unistra.fr) / [jimenezcalvo@unistra.fr](mailto:jimenezcalvo@unistra.fr)

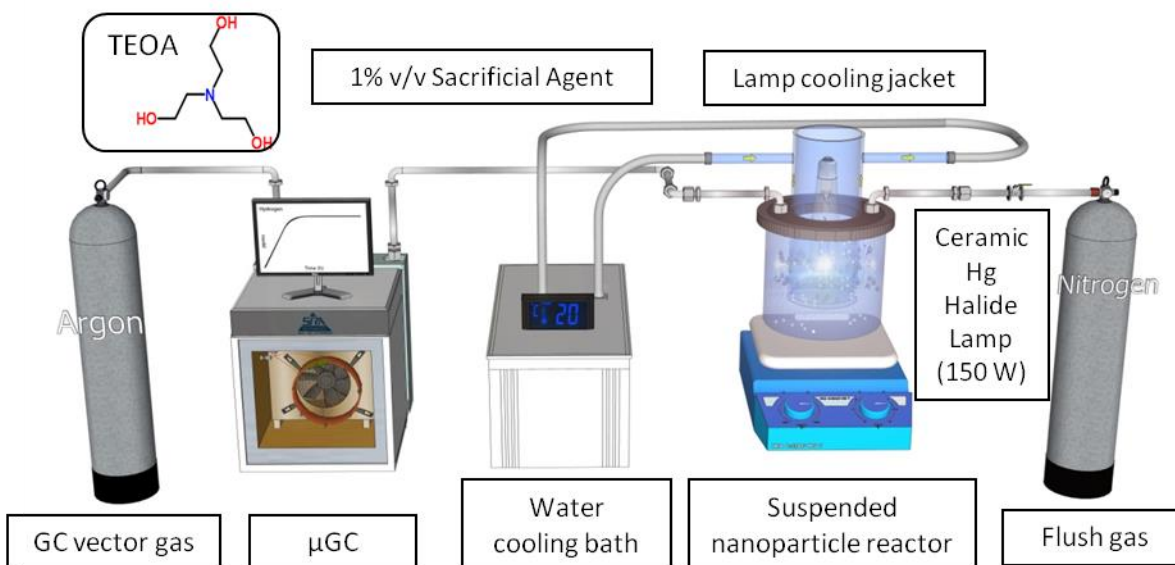

Figure S1. General scheme of the photocatalytic set-up.

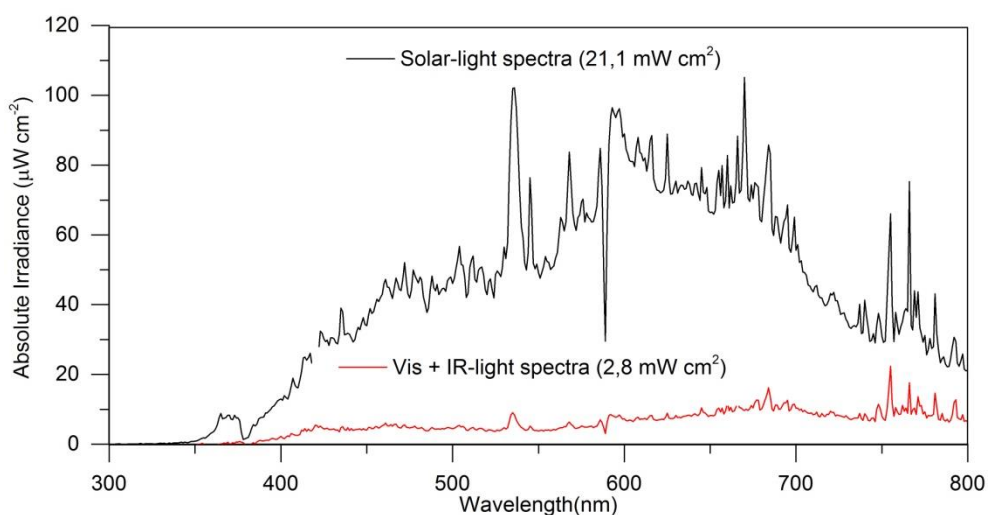

Figure S2. Light emission spectra of the Ceramic metal halide Hg lamp (150 W) used with the two solar and visible illumination configurations. For the visible configuration, a Nigrosin solution of 0.1 g L<sup>-1</sup> was added within the plunging quartz tube. The light emission was measured by using an ILT-900-R spectroradiometer from International Light Technologies.

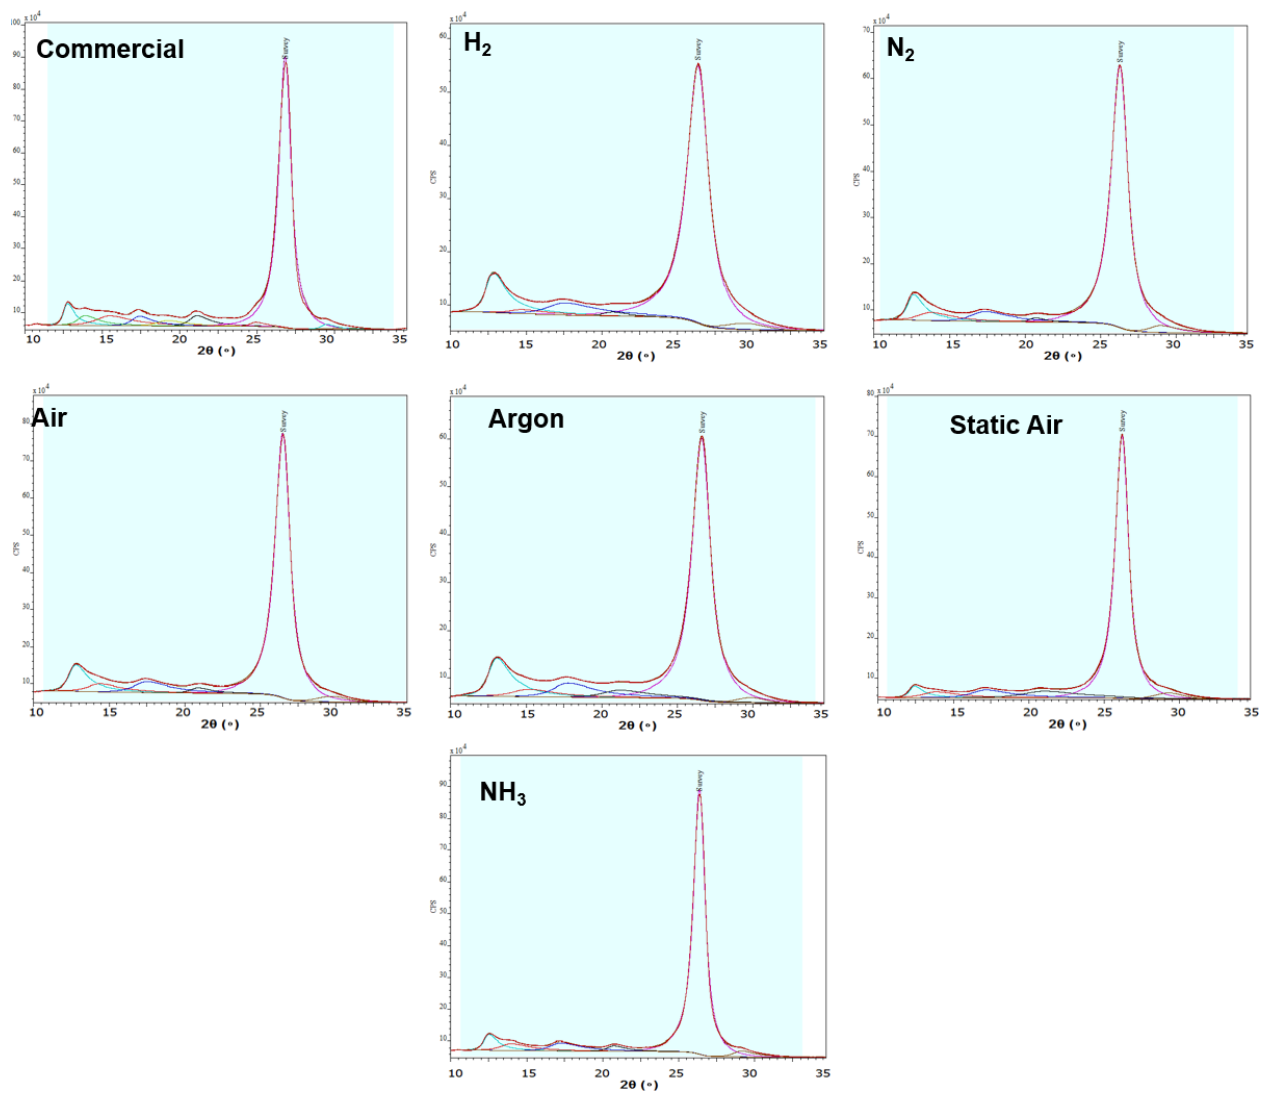

**Figure S3** XRD deconvoluted peaks for the calculus of the distance of s-triazine and tri-s-triazine phases, and the interlayer distance.

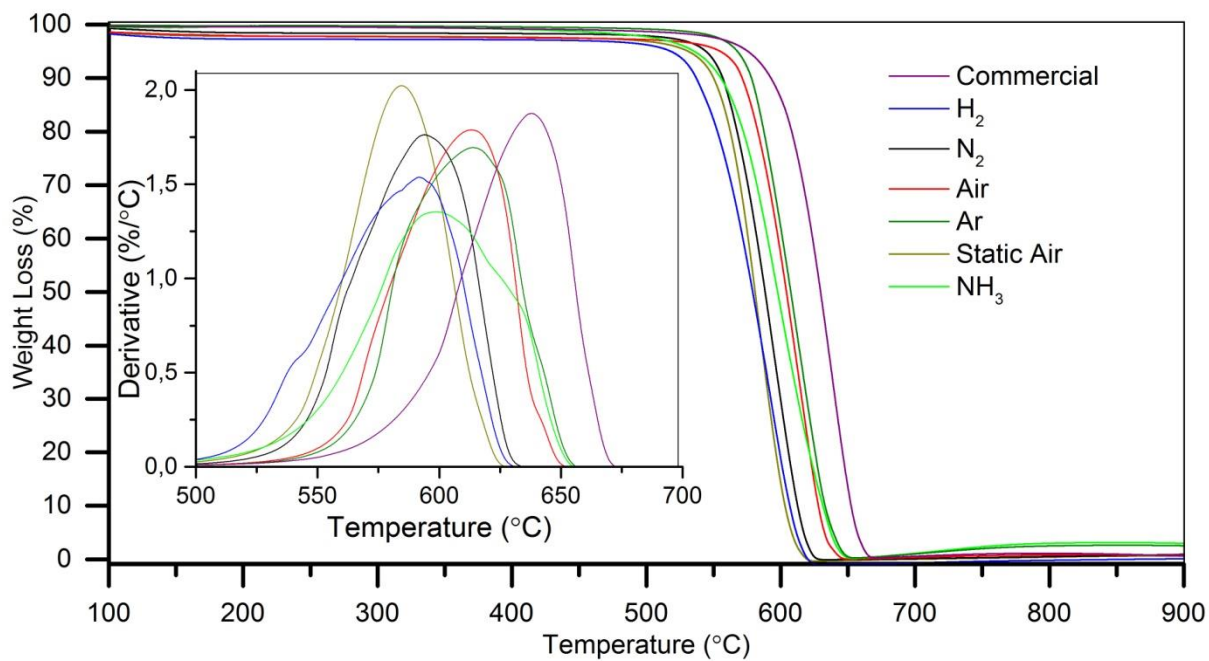

**Figure S4.** TGA profiles. **Inset)** Derivatives of weight loss from the references and from the g-C<sub>3</sub>N<sub>4</sub>-atm as-prepared samples.

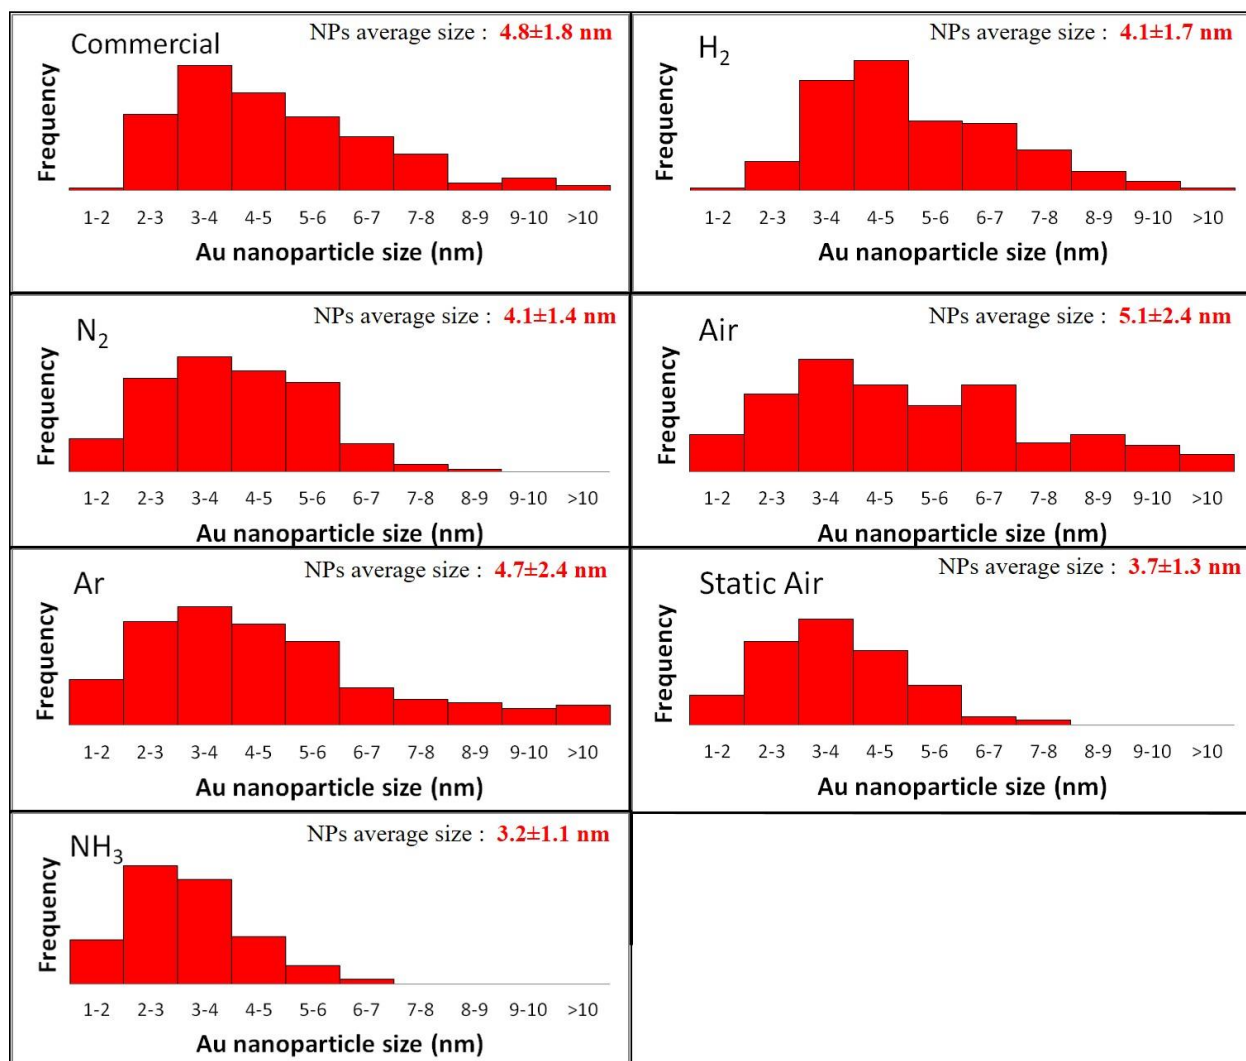

Figure S5. Particle size distribution obtained by TEM after (200 NPs for sample) for references and from the g-C<sub>3</sub>N<sub>4</sub>-atm as-prepared samples.

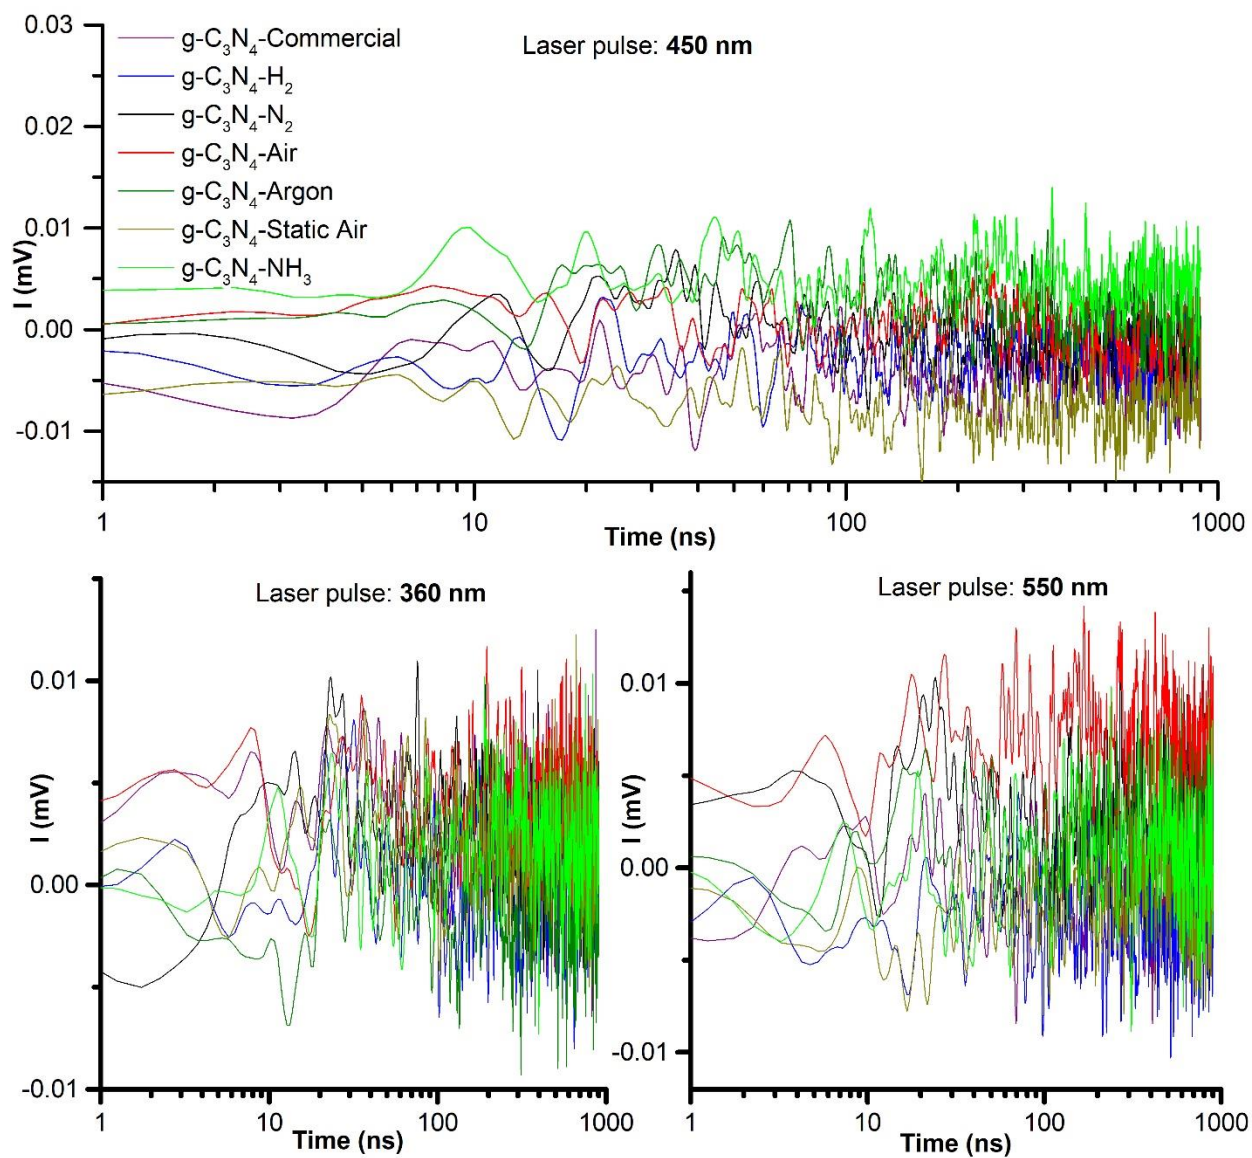

Figure S6. TRMC measurements of the references and of the as-prepared g-C<sub>3</sub>N<sub>4</sub>-atm samples at 360, 450, and 550 nm.

**Table S1.** ICP-MS results of the references and of the as-prepared g-C<sub>3</sub>N<sub>4</sub>-atm samples.

| <b>g-C<sub>3</sub>N<sub>4</sub>T</b> | <b>Dep. Yield (%)</b> | <b>Au content (wt. %)</b> |
|--------------------------------------|-----------------------|---------------------------|
| Commercial                           | 89±5                  | 0.27                      |
| H <sub>2</sub>                       | 81±4                  | 0.24                      |
| N <sub>2</sub>                       | 70±4                  | 0.21                      |
| Air                                  | 82±4                  | 0.25                      |
| Argon                                | 69±4                  | 0.21                      |
| Static Air                           | 81±4                  | 0.24                      |
| NH <sub>3</sub>                      | 89±5                  | 0.27                      |
